# Supplementary material for: Association between hyperlipidemia and chronic kidney disease in a Japanese population; a cross-sectional study
Source: Research Square preprint supplement (doi:10.21203/rs.3.rs-151545/v1), 2021-01-25
Supplement: Supplementary file 1 [file 08ef029e3b8f8566d5d73d27.xlsx]

## Sheet: Table1
Table 1. General characteristics of patients in CKD and non-CKD groups
	All patients	CKD group	non-CKD group
Variables	(n=5,169)	(n=917)	(n=4,252)	P value
Prevalence of CKD (%)		17.7	82.3
Age (years), mean (SD)	53.9 (11.2)	59.9 (6.8)	52.6 (11.5)	<0.001
Men (%)	36.2	32.1	37.1	0.004
BMI (kg/m2), mean (SD)	23.1 (3.0)	23.4 (3.0)	22.9 (3.0)	<0.001
SBP (mmHg) , mean (SD)	126.1 (18.9)	131.7 (19.0)	124.9 (18.7)	<0.001
DBP (mmHg), mean (SD)	76.3 (11.6)	78.3 (11.1)	75.8 (11.7)	<0.001
TC (mg/dL), mean (SD)	191.2 (34.7)	202.2 (34.7)	188.8 (34.3)	<0.001
TG (mg/dL), mean (SD)	122.5 (77.9)	132.3 (76.1)	120.4 (78.2)	<0.001
Hyperlipidemia (%)	36.6	48.3	34.1	<0.001
BS (mg/dL), mean (SD)	107.9 (28.3)	111.4. (31.2)	107.2 (27.7)	<0.001
Diabetes (%)	3.3	3.3	3.4	0.934
Current smoking habits (%)	22.9	14.9	24.6	<0.001
Current alcohol habits (%)	41.5	35	42.9	<0.001
CKD, chronic kidney disease; BMI, body mass index; SBP, systolic blood pressure; DBP, diastolic blood pressure; TC, total cholesterol; TG, triglycerides; BS, blood sugar; SD, standard deviation

## Sheet: Table2
Table 2. Factors affecting eGFR in a multiple linear regression analysis
Variables at baseline	β	SE	P
Age (years)	-0.308364	0.0267853	<0.001
Sex	-0.037188	0.766269	0.0325966
BMI (kg/m2)	-0.00470572	0.101206	0.740149
SBP (mmHg)	-0.133534	0.0163947	<0.001
Hyperlipidemia	-0.0562741	0.6134	<0.001
Diabetes	0.0764458	1.60268	<0.001
Current smoking habits	0.0515772	0.799764	0.00118086
Current alcohol habits	0.00466667	0.681109	0.768537
eGFR, estimated glomerular filtration rate; SE, standard error; BMI, body mass index; SBP, systolic blood pressure

## Sheet: Table3
Table 3. Odds ratios for CKD in a logistic regression analysis
	CKD＋
Variables at baseline	OR	95% CI			P
Age (years)	1.07498	1.06439	-	1.08568	<0.001
Sex	0.998471	0.800564	-	1.2453	0.989891
BMI (kg/m2)	1.01054	0.982711	-	1.03916	0.461714
SBP (mmHg)	1.00875	1.00435	-	1.01317	<0.001
TC<220 and TG<150	Ref.
TG≥150 mg/dL, alone (TC<220)	1.33608	1.07282	-	1.66395	0.00966001
TC≥220 mg/dL, alone (TG<150)	1.54648	1.2334	-	1.93905	<0.001
TC≥220 mg/dL and TG≥150 mg/dL	1.93941	1.48107	-	2.53959	<0.001
Diabetes	0.72322	0.463513	-	1.12844	0.153406
Current smoking habits	0.703295	0.549284	-	0.900488	0.00525188
Current alcohol habits	0.966987	0.793235	-	1.1788	0.739746
OR, odds ratio; CKD, chronic kidney disease; CI, confidence interval; BMI, body mass index; SBP, systolic blood pressure; TC, total cholesterol; TG, triglycerides
